# Supplementary material for: Characterizing Factors Associated with Excess Body Weight: A Descriptive Study Using Principal Component Analysis in a Population with Overweight and Obesity
Source: MDPI journal article supplement (doi:10.3390/nu16081143), 2024-04-12
Supplement: s1 [file s1]

Supplementary information

# Characterizing Factors Associated with Excess Body Weight: A Descriptive Study Using Principal Component Analysis in a Population with Overweight and Obesity

Álvaro Fernández-Cardero <sup>1</sup>, José Luis Sierra-Cinos <sup>2,3</sup>, Adrián López-Jiménez <sup>1</sup>, Beatriz Beltrán <sup>2</sup>, Carmen Cuadrado <sup>2</sup>, María Teresa García-Conesa <sup>4</sup>, Laura Bravo <sup>1</sup> and Beatriz Sarriá <sup>1,2,\*</sup>

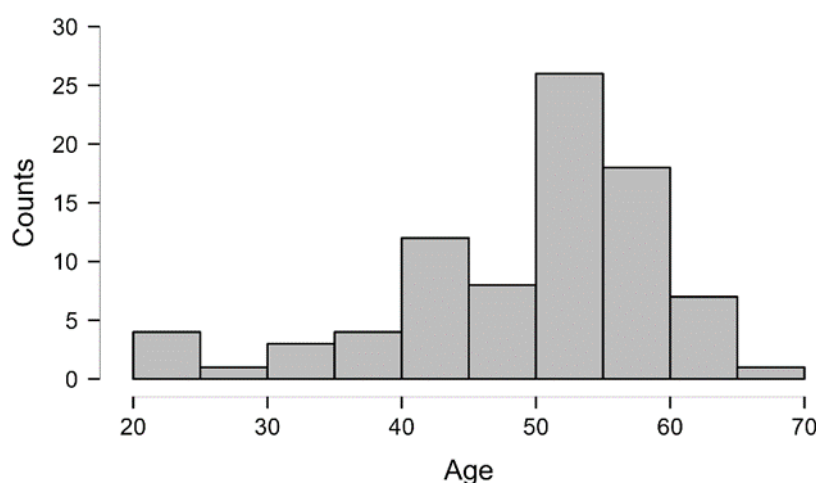

**Figure S1.** Histogram of subjects' age.

**Table S1.** Main food groups and food items included in the estimation of the daily dietary polyphenol intake of the overweight/obese participants. Based on the average results of the food items consumed by the participants (as analysed by the DIAL software for assessing diets and food calculations) coupled with the content of total (poly)phenols in the Phenol Explorer database.

| Food group              | Main food items included                                                                                                                                                                                                                                                                                                        |
|-------------------------|---------------------------------------------------------------------------------------------------------------------------------------------------------------------------------------------------------------------------------------------------------------------------------------------------------------------------------|
| Cereals and derivatives | Bread (white, grain, rye), breakfast cereals (bran, muesli, oat), wheat flour (refined, whole grain), pasta (normal, whole grain), rice (boiled), oat, maize.                                                                                                                                                                   |
| Oils and olives         | Olive oil (refined, virgin, extra virgin), sunflower seed oil, olives (green), peanut butter.                                                                                                                                                                                                                                   |
| Vegetables              | Onion (white), lettuce (green), arugula, asparagus, tomato (normal, cherry), spinach, globe artichokes, cucumber, zucchini, pumpkin, eggplant, Swiss chard leaves, endive, green beans, common cabbage green, sweet pepper (red, green), carrots, broccoli, cauliflower, celeriac, Brussel sprouts, capers, sweet potato (raw). |
| Fruits and derivatives  | Apple, banana (raw), apricot (fruit, jam), pineapple, pear (peeled), orange, fig, peach, kiwi, lemon, mango, plum, tangerine, pomegranate, strawberry (fruit, jam), watermelon, honeydew melon, grapefruit, quince, guava, grape (green, raisin), bilberry, red raspberry (fruit, jam), avocado, custard apple.                 |
| Processed               | Tomato sauce, ketchup, mayonnaise, cakes, cookies (normal, whole grain), potato chips snacks, vegetable mix (stew, cream).                                                                                                                                                                                                      |
| Condiments              | Cinnamon, pepper spice (black, white), vinegar, saffron, turmeric (dried), ginger (dried), cumin, nutmeg, cloves, anise herb (dried).                                                                                                                                                                                           |

|                       |                                                                                                                                       |
|-----------------------|---------------------------------------------------------------------------------------------------------------------------------------|
| Herbs                 | Garlic (fresh), parsley (fresh), oregano (dried).                                                                                     |
| Tubers                | Potato (boiled).                                                                                                                      |
| Alcoholic drinks      | Beer, wine (red, white, rose), rum.                                                                                                   |
| Cocoa and derivatives | Cocoa powder, chocolate (milk, dark).                                                                                                 |
| Infusions             | Tea (green), German camomile tea.                                                                                                     |
| Legumes               | Lentils, chickpeas, common bean (white).                                                                                              |
| Nuts                  | Almonds, walnuts, hazelnuts (raw), chestnuts, pistachio, peanut (roasted), sunflower seeds, cashew nut (raw), macadamia, brazil nuts. |
| Juices                | Orange (pure juice), lemon juice from concentrate), pineapple (pure juice).                                                           |
| Soy and derivatives   | Soybean sprout (raw), soy sauce, soy yogurt, soy milk.                                                                                |

**Notes:** Food items not found in the database and therefore excluded from the analysis: generic infusion, sesame seeds, flax seeds, mushrooms, honey, leeks, bay leaves, paprika, rice, almond and oat drinks, green peas, quinoa, beetroot, mustard, khaki, wakame seaweed, Christmas desserts (nougat, marzipan), palm oil, pickled cucumber, lamb's lettuce vegetables.

**Table S2.** Distribution of the daily dietary intake of (poly)phenols across the main food sources analysed (data obtained from 24h dietary recalls analysed by DIAL and Phenol Explorer database).

|                         | N<br>(% of<br>consumers) | Mean ± SD<br>(mg/day) | Median (IQR)<br>(mg/day) | [Min, Max]<br>(mg/day) | CV(%) |
|-------------------------|--------------------------|-----------------------|--------------------------|------------------------|-------|
| Cereals and derivatives | 81 (100)                 | 138.1 ± 67.6          | 136.4 (88.9)             | [1.0, 330.5]           | 49.0  |
| Oils and olives         | 80 (98.8)                | 15.6 ± 11.5           | 12.8 (8.6)               | [1.0, 73.7]            | 73.3  |
| Vegetables              | 80 (98.8)                | 119.4 ± 111.7         | 90.3 (99.9)              | [5.8, 472.5]           | 93.6  |
| Fruits and derivatives  | 74 (91.4)                | 293.2 ± 207.0         | 217.9 (311.8)            | [1.3, 743.4]           | 70.6  |
| Processed               | 71 (87.7)                | 48.9 ± 74.3           | 26.8 (39.2)              | [2.2, 465.3]           | >100  |
| Condiments              | 64 (79.0)                | 21.6 ± 51.7           | 3.8 (8.2)                | [0.2, 330.3]           | >100  |
| Herbs                   | 62 (76.5)                | 2.8 ± 6.4             | 1.0 (1.6)                | [0.2, 41.2]            | >100  |
| Tubers                  | 61 (75.3)                | 49.0 ± 37.2           | 40.2 (48.0)              | [4.5, 179.8]           | 75.9  |
| Alcoholic drinks        | 52 (64.2)                | 131.3 ± 145.6         | 89.9 (166.9)             | [0.4, 322.1]           | >100  |
| Cocoa and derivatives   | 46 (56.8)                | 371.0 ± 387.0         | 239.2 (312.5)            | [14.5, 1645.6]         | >100  |
| Infusions               | 45 (55.6)                | 99.0 ± 63.7           | 82.3 (77.7)              | [1.7, 247.4]           | 64.4  |

|                            |           |               |               |               |      |
|----------------------------|-----------|---------------|---------------|---------------|------|
| <b>Legumes</b>             | 31 (38.3) | 504.5 ± 714.9 | 29.3 (1026.5) | [1.0, 3079.9] | >100 |
| <b>Nuts</b>                | 28 (34.6) | 216.6 ± 285.1 | 124.2 (259.5) | [2.6, 1398.0] | >100 |
| <b>Juices</b>              | 24 (29.6) | 42.0 ± 38.5   | 43.6 (50.9)   | [2.7, 157.6]  | 91.5 |
| <b>Soy and derivatives</b> | 20 (24.7) | 31.5 ± 36.4   | 18.9 (28.2)   | [0.1, 118.2]  | >100 |

*N* = Sample size of consumers of that food source. Percentage of participants that consume that food source in comparison with the total sample population included in the analysis (*n*=81).

**Table S3.** Component rotated array from PCA of the diet, eigenvalues, and percentage of total variance from each factor.

|                              | <b>PC1</b>   | <b>PC2</b>   | <b>Uniqueness</b> |
|------------------------------|--------------|--------------|-------------------|
| Energy Intake                | <b>0.903</b> | 0.349        | 0.062             |
| Lipids                       | <b>0.896</b> | 0.277        | 0.120             |
| SFA <sup>a</sup>             | <b>0.895</b> | 0.139        | 0.180             |
| Proteins <sup>a</sup>        | <b>0.830</b> | 0.155        | 0.287             |
| MUFA <sup>a</sup>            | <b>0.801</b> | 0.282        | 0.279             |
| Dietary cholesterol          | <b>0.634</b> | -0.085       | 0.591             |
| Carbohydrates                | <b>0.623</b> | 0.312        | 0.515             |
| PUFA <sup>a</sup>            | <b>0.615</b> | 0.333        | 0.510             |
| (Poly)phenols <sup>a</sup>   | 0.100        | <b>0.881</b> | 0.213             |
| Dietary fibre <sup>a</sup>   | 0.252        | <b>0.814</b> | 0.274             |
| Intrinsic sugars             | 0.161        | <b>0.762</b> | 0.393             |
| Added sugars <sup>a</sup>    | 0.397        | 0.080        | 0.836             |
| Eigenvalues                  | 6.123        | 1.617        |                   |
| Percentage of total variance | 43.1         | 21.4         |                   |

Extraction method: principal component analysis using parallel analysis. Rotation method: Varimax. Superscript <sup>a</sup> indicated variables that were transformed using natural logarithms (Ln) to achieve a normal distribution before introducing them into the PCA.

**Table S4.** Component rotated array from PCA of anthropometric, body composition and biochemical measurements, eigenvalues, and percentage of total variance from each factor.

|                      | <b>PC1</b>    | <b>PC2</b>   | <b>PC3</b>   | <b>Uniqueness</b> |
|----------------------|---------------|--------------|--------------|-------------------|
| TG <sup>a</sup>      | <b>0.860</b>  | 0.037        | -0.014       | 0.259             |
| VLDL <sup>a</sup>    | <b>0.857</b>  | 0.037        | -0.018       | 0.264             |
| Waist/hip ratio      | <b>0.764</b>  | -0.182       | 0.065        | 0.379             |
| HDL <sup>a</sup>     | <b>-0.731</b> | 0.072        | <b>0.471</b> | 0.238             |
| HOMA-IR <sup>a</sup> | <b>0.684</b>  | 0.202        | -0.184       | 0.457             |
| SBP                  | <b>0.609</b>  | -0.023       | <b>0.427</b> | 0.447             |
| DBP                  | <b>0.560</b>  | -0.028       | <b>0.429</b> | 0.502             |
| BMI                  | <b>0.535</b>  | <b>0.643</b> | -0.145       | 0.279             |
| % Body fat           | -0.069        | <b>0.972</b> | 0.087        | 0.042             |

|                                                 | PC1    | PC2           | PC3          | Uniqueness |
|-------------------------------------------------|--------|---------------|--------------|------------|
| % Muscle Mass                                   | 0.115  | <b>-0.941</b> | -0.127       | 0.086      |
| Visceral Fat Area                               | 0.214  | <b>0.932</b>  | 0.003        | 0.086      |
| SUMM 6 skinfolds <sup>a</sup>                   | -0.137 | <b>0.812</b>  | -0.192       | 0.286      |
| Total Cholesterol                               | -0.076 | 0.017         | <b>0.914</b> | 0.159      |
| LDL                                             | -0.028 | -0.035        | <b>0.853</b> | 0.270      |
| Eigenvalues                                     | 4.268  | 3.717         | 2.260        |            |
| Percentage of total variance (rotated solution) | 29.4   | 27.5          | 16.2         |            |

Extraction method: principal component analysis using parallel analysis. Rotation method: Varimax. Superscript a indicated variables that were transformed using natural logarithms (Ln) to achieve a normal distribution before introducing them into the PCA.

**Table S5.** Component rotated array from PCA of diet, anthropometric, body composition and biochemical measurements, eigenvalues, and percentage of total variance from each factor.

|                                                 | PC1          | PC2           | PC3           | PC4          | Uniqueness |
|-------------------------------------------------|--------------|---------------|---------------|--------------|------------|
| Energy Intake                                   | <b>0.950</b> | 0.021         | -0.146        | -0.051       | 0.072      |
| Lipids                                          | <b>0.921</b> | 0.063         | -0.043        | -0.018       | 0.145      |
| SFA <sup>a</sup>                                | <b>0.865</b> | 0.041         | 0.011         | -0.101       | 0.239      |
| MUFA <sup>a</sup>                               | <b>0.839</b> | 0.112         | -0.016        | 0.089        | 0.275      |
| Proteins <sup>s</sup>                           | <b>0.792</b> | 0.187         | -0.184        | 0.224        | 0.254      |
| PUFA <sup>a</sup>                               | <b>0.702</b> | 0.018         | -0.066        | 0.104        | 0.492      |
| Carbohydrates                                   | <b>0.678</b> | -0.106        | -0.166        | -0.210       | 0.457      |
| Dietary fibre                                   | <b>0.570</b> | -0.094        | -0.288        | -0.198       | 0.545      |
| Dietary cholesterol                             | <b>0.523</b> | 0.294         | -0.066        | 0.263        | 0.567      |
| Intrinsic sugars                                | <b>0.510</b> | -0.094        | -0.000        | 0.003        | 0.731      |
| (Poly)phenols <sup>a</sup>                      | <b>0.487</b> | -0.191        | -0.092        | -0.039       | 0.716      |
| Added sugars <sup>a</sup>                       | <b>0.411</b> | -0.232        | 0.113         | -0.230       | 0.711      |
| TG <sup>a</sup>                                 | -0.148       | <b>0.871</b>  | 0.006         | 0.006        | 0.220      |
| VLDL <sup>a</sup>                               | -0.154       | <b>0.868</b>  | 0.004         | 0.003        | 0.224      |
| Waist/hip ratio                                 | 0.046        | <b>0.764</b>  | -0.164        | 0.033        | 0.386      |
| HDL <sup>a</sup>                                | 0.054        | <b>-0.726</b> | 0.077         | <b>0.472</b> | 0.241      |
| HOMA-IR <sup>a</sup>                            | -0.031       | <b>0.683</b>  | 0.176         | -0.158       | 0.477      |
| SBP                                             | 0.140        | <b>0.589</b>  | 0.003         | 0.312        | 0.536      |
| DBP <sup>a</sup>                                | 0.182        | <b>0.572</b>  | -0.003        | 0.333        | 0.529      |
| BMI                                             | -0.089       | <b>0.519</b>  | <b>0.653</b>  | -0.165       | 0.269      |
| % Body Fat                                      | -0.101       | -0.086        | <b>0.960</b>  | 0.114        | 0.047      |
| % Muscle mass                                   | 0.107        | 0.126         | <b>-0.926</b> | -0.159       | 0.090      |
| Visceral Fat area                               | -0.155       | 0.194         | <b>0.923</b>  | 0.016        | 0.087      |
| SUMM 6 skinfolds                                | -0.111       | -0.144        | <b>0.790</b>  | -0.150       | 0.321      |
| Total cholesterol                               | -0.084       | -0.035        | 0.042         | <b>0.928</b> | 0.129      |
| LDL                                             | -0.058       | 0.013         | 0.007         | <b>0.868</b> | 0.243      |
| Eigenvalues                                     | 6.734        | 4.394         | 3.431         | 2.440        |            |
| Percentage of total variance (rotated solution) | 24.0         | 16.8          | 15.2          | 9.4          |            |

Extraction method: principal component analysis using parallel analysis. Rotation method: Varimax. Superscript a indicated variables that were transformed using natural logarithms (Ln) to achieve a normal distribution before introducing them into the PCA.
